# Supplementary material
Source: PubMed Central journal article supplement (PMC5508605)
Supplement: NIHMS876106-supplement-Related_Manuscript_File.pdf [file NIHMS876106-supplement-Related_Manuscript_File.pdf]

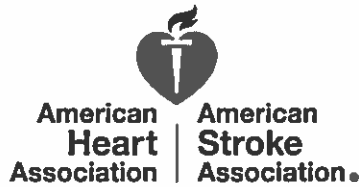

## Acknowledgment Permission Form

---

Journal Stroke

Manuscript Number STROKE/2016/016474R1

First Author Changjun Yang

Title of Work Sustained neurological recovery after stroke in aged rats treated with a novel prostacyclin analog

Authors must provide written permission/approval from all individuals mentioned by name in the Acknowledgments section of a submitted manuscript. By signing this form, any and all acknowledged persons therefore state that they have read and approved the mention of their names in the Acknowledgment section of the aforementioned paper.

|           |                            |           |                                                                                           |      |                 |
|-----------|----------------------------|-----------|-------------------------------------------------------------------------------------------|------|-----------------|
| Name (1)  | <u>Kimberly E. Hawkins</u> | Signature | <u>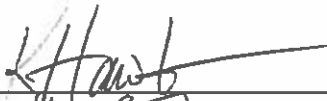</u> | Date | <u>5/2/17</u>   |
| Name (2)  | <u>Huadong Zeng</u>        | Signature | <u></u> | Date | <u>5/2/2017</u> |
| Name (3)  | <u></u>                    | Signature | <u></u>                                                                                   | Date | <u></u>         |
| Name (4)  | <u></u>                    | Signature | <u></u>                                                                                   | Date | <u></u>         |
| Name (5)  | <u></u>                    | Signature | <u></u>                                                                                   | Date | <u></u>         |
| Name (6)  | <u></u>                    | Signature | <u></u>                                                                                   | Date | <u></u>         |
| Name (7)  | <u></u>                    | Signature | <u></u>                                                                                   | Date | <u></u>         |
| Name (8)  | <u></u>                    | Signature | <u></u>                                                                                   | Date | <u></u>         |
| Name (9)  | <u></u>                    | Signature | <u></u>                                                                                   | Date | <u></u>         |
| Name (10) | <u></u>                    | Signature | <u></u>                                                                                   | Date | <u></u>         |
| Name (11) | <u></u>                    | Signature | <u></u>                                                                                   | Date | <u></u>         |
| Name (12) | <u></u>                    | Signature | <u></u>                                                                                   | Date | <u></u>         |
| Name (13) | <u></u>                    | Signature | <u></u>                                                                                   | Date | <u></u>         |
| Name (14) | <u></u>                    | Signature | <u></u>                                                                                   | Date | <u></u>         |
| Name (15) | <u></u>                    | Signature | <u></u>                                                                                   | Date | <u></u>         |
| Name (16) | <u></u>                    | Signature | <u></u>                                                                                   | Date | <u></u>         |
| Name (17) | <u></u>                    | Signature | <u></u>                                                                                   | Date | <u></u>         |
| Name (18) | <u></u>                    | Signature | <u></u>                                                                                   | Date | <u></u>         |
| Name (19) | <u></u>                    | Signature | <u></u>                                                                                   | Date | <u></u>         |
| Name (20) | <u></u>                    | Signature | <u></u>                                                                                   | Date | <u></u>         |
